# Supplementary material for: Ligand-Dependent and G Protein-Dependent Properties for the Sweet Taste Heterodimer, TAS1R2/1R3
Source: PubMed Central journal article supplement — J Phys Chem B. 2024 Sep 4;128(37):8927–32. doi: 10.1021/acs.jpcb.4c04610 (PMC11421092; doi:10.1021/acs.jpcb.4c04610), 2024-09-04
Supplement: jp4c04610_si_001.pdf [file jp4c04610_si_001.pdf]

1 *Supporting Information for*

2 **Ligand Dependent and G Protein Dependent Properties for the Sweet Taste Heterodimer,**

3 **TAS1R2/1R3**

4 Soo-Kyung Kim,<sup>1</sup> Brian Guthrie,<sup>2</sup> and William A. Goddard III.<sup>1,\*</sup>

5 <sup>1</sup>Materials and Process Simulation Center (139-74), California Institute of Technology, Pasadena,  
6 California 91125, United States

7 <sup>2</sup>Cargill Global Core Research, Wayzata, MN 55391, United States

8 \* Correspondence: wag@caltech.edu; ORCID: 0000-0003-0097-5716

9 Soo-Kyung Kim; 1004skkim@gmail.com, ORCID: 0000-0002-4498-5441

10 Brian Guthrie: Brian\_Guthrie@cargill.com, ORCID: 0000-0002-3508-4625

11

12

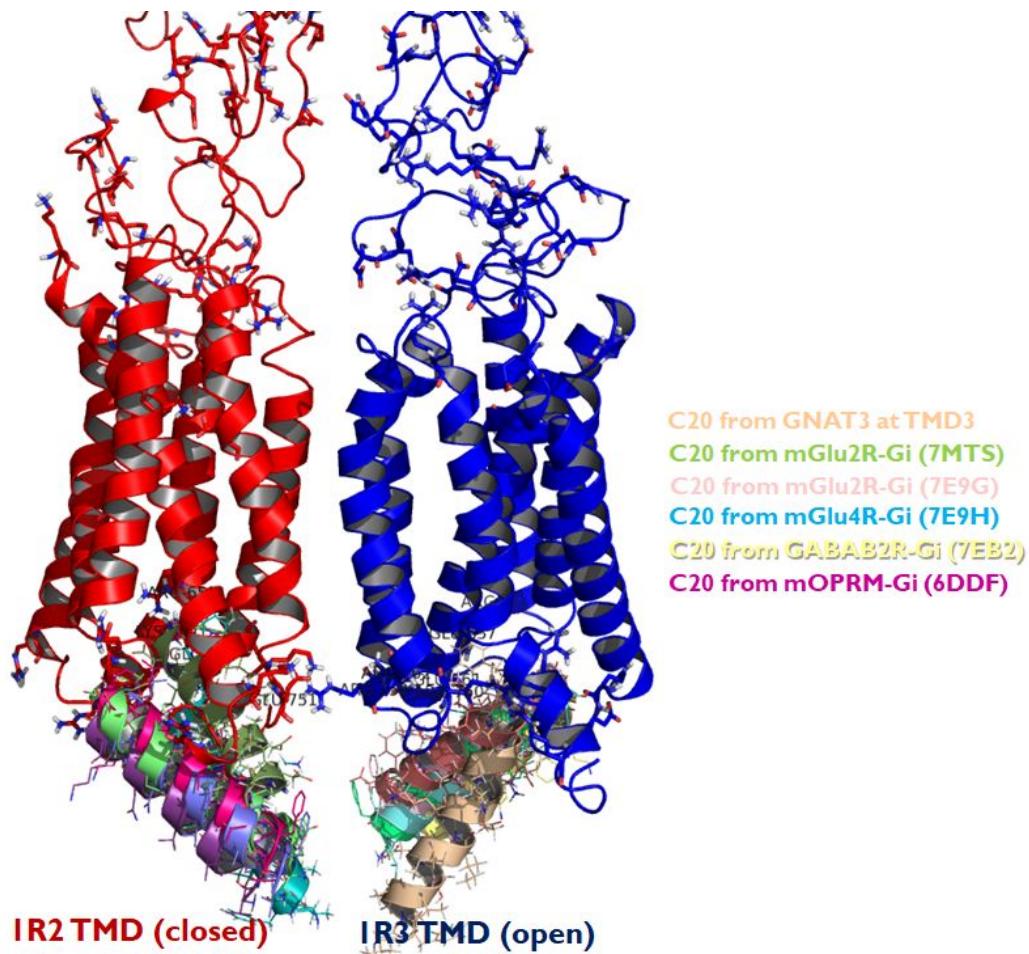

13

14 **Figure S1.** The various initial positions of the C-terminal  $\alpha$ -helices of the C20 G protein peptide at the  
15 cytoplasmic transmembrane domain (TMD) of closed taste receptor TAS1R2 (red) and open IR3  
16 (blue) between helix 3 and 6 prior to MD simulations. The initial positions of GNAT3 C20 were  
17 generated after aligning the experimental structures of GPCR-G protein complexes, four class C  
18 mGlu2R-Gi (PDB ID: 7MTS,<sup>12</sup> 7E9G<sup>13</sup>), mGlu4R-Gi (PDB ID: 7E9H)<sup>13</sup>, GABAB2R-Gi (PDB ID:  
19 7EB2)<sup>14</sup>, and one class A OPRM-Gi (PDB ID 6DDF)<sup>15</sup>. We also included our predicted structure  
20 of the GNAT3-TAS1R3/IR3 homodimer complex from molecular dynamics.<sup>16</sup>

21

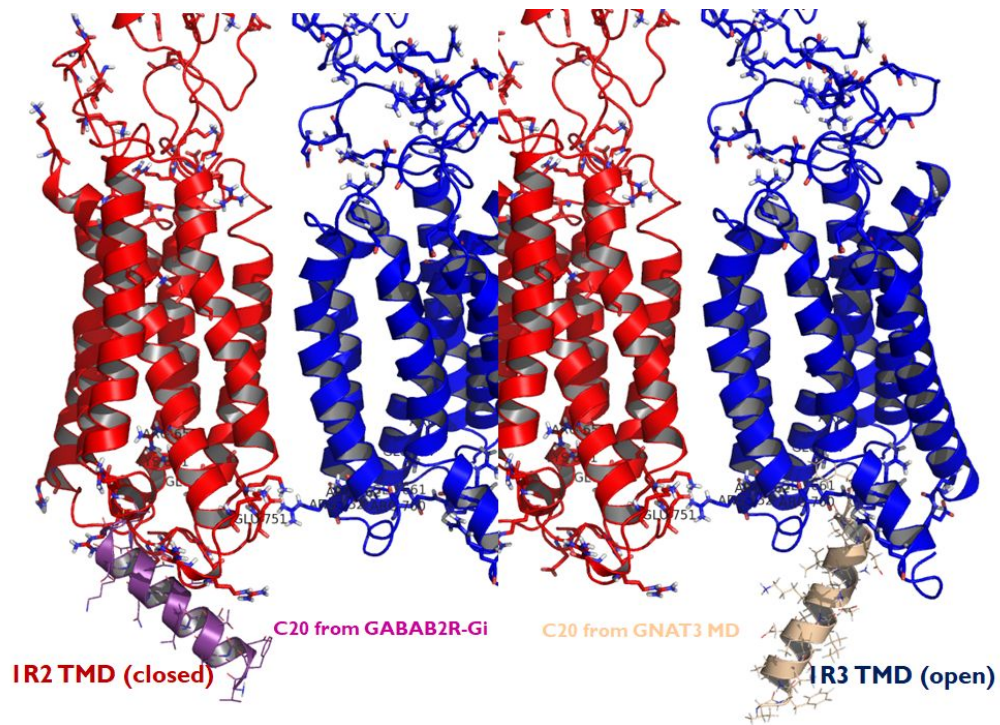

22

23 **Figure S2.** The best initial positions of the C-terminal  $\alpha$ -helices of C20 G protein peptide at the cytoplasmic  
 24 transmembrane domain (TMD) of closed taste receptor TAS1R2 (red) and open TAS1R3 (blue)  
 25 between helix 3 and 6. The best C20 orientation for the TMD2 is from GABAB2R-Gi (PDB ID:  
 26 7EB2)<sup>14</sup> in the class C GPCR-like non-canonical way, while the best C20 orientation for TMD3 is  
 27 from our predicted structure of the GNAT3-TAS1R3/1R3 homodimer complex in the class A  
 28 GPCR-like canonical way.<sup>16</sup>

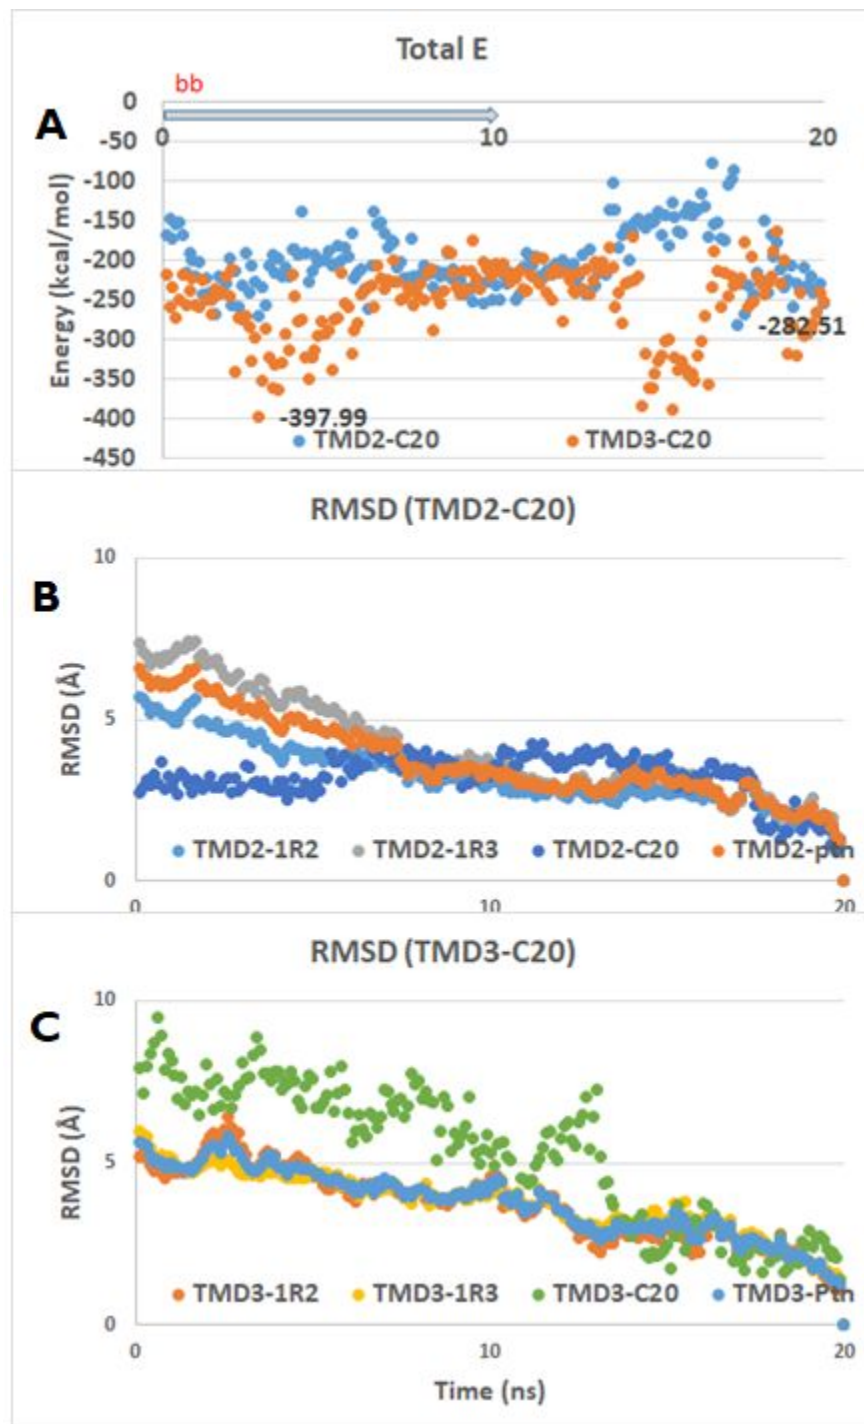

29

30 **Figure S3.** (A) Interaction energy between C20 and TAS1R2 or TAS1R3 over 20 ns (B and C) The root  
 31 mean square deviation (RMSD) of the TAS1R2/1R3-C20 complex when C20 binds at 7  
 32 transmembrane domain (TMD) of TAS1R2 (TMD2-C20) or TAS1R3 (TMD3-C20).
